# Supplementary material
Source: HighWire-hosted journal article supplement (http://jpet.aspetjournals.org/highwire/filestream/139439/field_highwire_adjunct_files/0/240382_suppl_data.pdf)
Supplement: 240382_suppl_data.pdf [file 240382_suppl_data.pdf]

## **Supplemental data**

### **Journal of Pharmacology and Experimental Therapeutics**

#### **Comprehensive Characterization of Mouse UDP-Glucuronosyltransferase (Ugt) belonging to the Ugt2b Subfamily: Identification of Ugt2b36 as the Predominant Isoform Involved in Morphine Glucuronidation**

Ayumi Kurita, Yuu Miyauchi, Shin'ichi Ikushiro, Peter I. Mackenzie, the late Hideyuki Yamada, and Yuji Ishii

Laboratory of Molecular Life Sciences, Graduate School of Pharmaceutical Sciences, Kyushu University, Fukuoka, Japan (A.K., Y.M., H.Y., Y.I.)

Department of Biotechnology, Faculty of Engineering, Toyama Prefectural University, 5180 Kurokawa, Imizu, Toyama 939-0398, Japan (S. I.)

Department of Clinical Pharmacology and Flinders Centre for Innovation in Cancer, Flinders University School of Medicine, Flinders Medical Centre, Bedford Park, SA, Australia (P.I.M.)

Supplemental Table 1 Condition of PCR

| Isoforms | Round | Methods (two or three cycles) | Annealing temperature (°C) |
|----------|-------|-------------------------------|----------------------------|
| Ugt1a1   | 1     | two                           | 68                         |
|          | 2     | two                           | 68                         |
| Ugt2a3   | 1     | three                         | 54                         |
|          | 2     | two                           | 68                         |
| Ugt2b1   | 1     | two                           | 68                         |
|          | 2     | two                           | 68                         |
| Ugt2b5   | 1     | three                         | 57                         |
|          | 2     | two                           | 68                         |
| Ugt2b34  | 1     | three                         | 57                         |
|          | 2     | two                           | 68                         |
| Ugt2b35  | 1     | three                         | 57                         |
|          | 2     | two                           | 68                         |
| Ugt2b36  | 1     | three                         | 57                         |
|          | 2     | two                           | 68                         |
| Ugt2b37  | 1     | three                         | 57                         |
|          | 2     | two                           | 68                         |
| Ugt2b38  | 1     | two                           | 68                         |

---

PCR conditions to generate the Ugts are listed. PCR methods were selected using the  $T_m$  value of the primers. When both of the primers had a  $T_m$  higher than 63 °C, we carried out the PCRs by the two cycle method (Table S2). When one of the primers had a lower  $T_m$  than 63 °C or we failed to obtain a PCR product using the two cycle method, the three cycle method was selected. In the two cycle method (Table S2), the extension temperature was fixed at 68 °C. Primers used in the PCR are shown in Table 1.

Supplement Table 2 PCR methods used in supplemental Table 1.

| Two cycle method | Number of cycles | Temperature (°C) | Duration |
|------------------|------------------|------------------|----------|
| Predenature      | 1                | 94               | 2 min    |
| Denature         | 30               | 98               | 10 s     |
| Extension        |                  | 68               | 30 s/kb  |
| Preservation     | 1                | 4                | ∞        |

  

| Three cycle method | Number of cycles | Temperature (°C) | Duration |
|--------------------|------------------|------------------|----------|
| Predenature        | 1                | 94               | 2 min    |
| Denature           | 30               | 98               | 10 s     |
| Annealing          |                  | Tm- 3            | 30 s     |
| Extension          |                  | 68               | 30 s/kb  |
| Preservation       | 1                | 4                | ∞        |

Supplemental Table 3 Multiple alignment of amino acid sequences between the antigen peptide (human UGT2B7) to produce anti-UGT2B antibody and the corresponding residues in mouse Ugt isoforms

| Ugt isoform              | Amino acid sequences        | Residues |
|--------------------------|-----------------------------|----------|
| Antigen peptide (UGT2B7) |                             |          |
| Common in human UGT2B    | <b>KWIPQNDLLGHPK</b>        | 355-367  |
| Ugt1a1                   | <b>KWLPQNDLLGHPK</b>        | 355-367  |
| Ugt2a3                   | <b>NWIPQNDLLGHPK</b>        | 355-367  |
| Ugt2b1                   | <b>KWIPQNDLLGHPK</b>        | 356-368  |
| Ugt2b5                   | <b>KWLPQNDLLGHPK</b>        | 356-368  |
| Ugt2b34                  | <b>KWIPQNDLLGH<b>S</b>K</b> | 358-370  |
| Ugt2b35                  | <b>KWLPQNDLLGHPK</b>        | 355-367  |
| Ugt2b36                  | <b>KWLPQNDLLGHPK</b>        | 356-368  |
| Ugt2b37                  | <b>KWLPQNDLLGHPK</b>        | 356-368  |
| Ugt2b38                  | <b>KWLPQNDLLGHPK</b>        | 356-368  |

Different amino acids are shown in gray background.

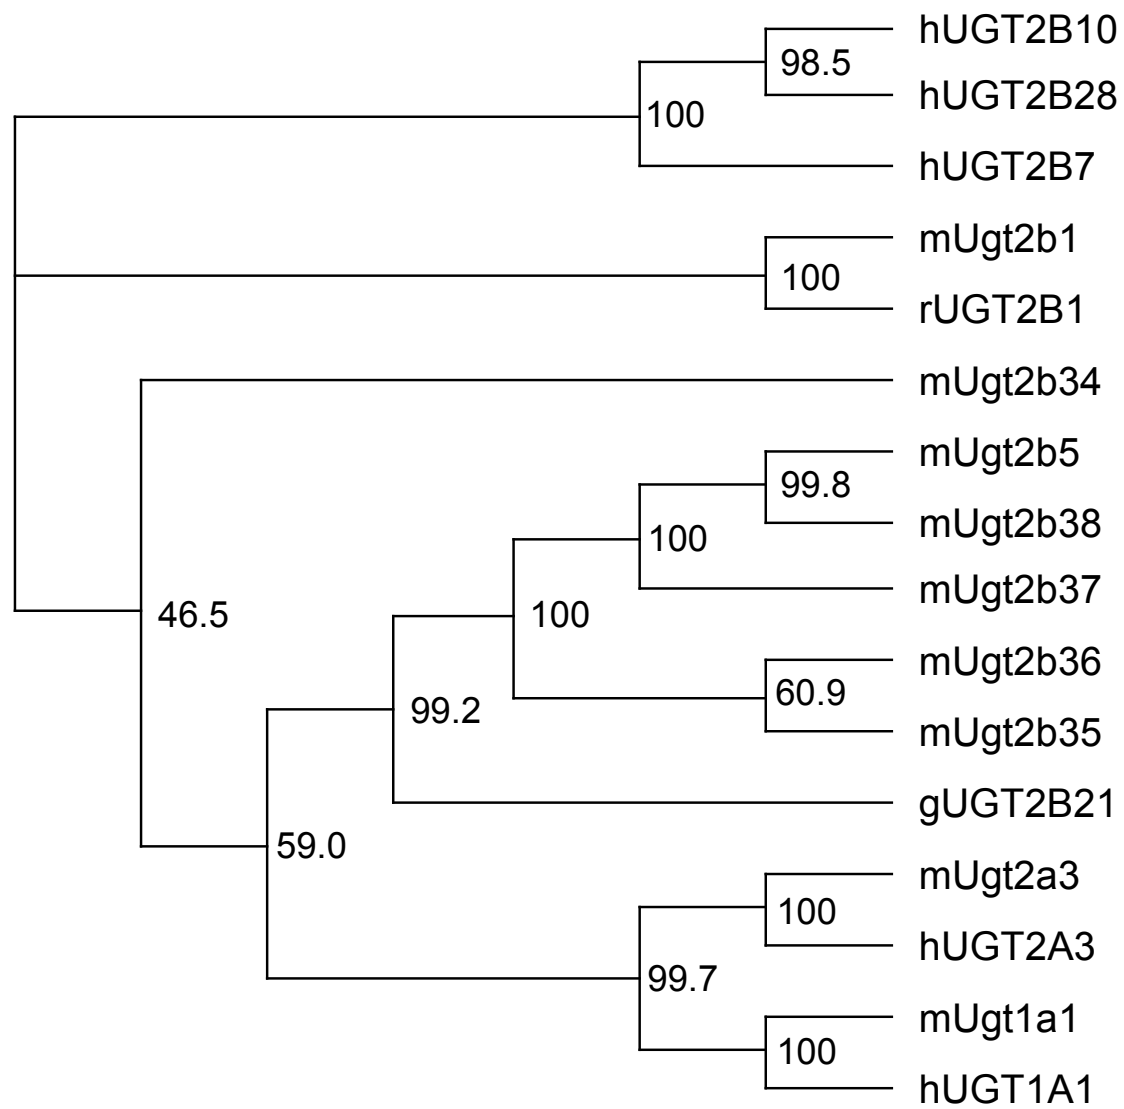

**Supplemental Figure S1. Phylogenetic tree of the selected UGT isoforms from some animals using the Neighbor-joining (NJ) method.** Their UGT amino acid sequences were obtained from the National Center for Biotechnology Information (NCBI) Gene. The following GenBank accession-numbers were used: human UGT1A1 (AAI28415)(Ritter et al, 1991), human UGT2A3 (AAI30534)(Court et al, 2008), human UGT2B7 (AAH30974)(Ritter et al, 1990), human UGT2B10 (AAI13650)(Jin et al, 1994), human UGT2B17 (EAW55622)(Beaulieu et al, 1996), human UGT2B28 (NP\_001064)(Lévesque et al, 2001), rat UGT2B1 (NP\_775417)(Mackenzie, 1988), guinea pig UGT2B21 (BAB82476)(Ishii et al, 2001). Robustness of bifurcation was estimated by bootstrap analysis with 1000 replicates. The numbers in the tree indicate the bootstrap values as a percentage. Annotation: m (mouse), h (human), r (rat), and g (guinea pig). A distance-based neighbor-joining phylogenetic tree was generated (Saitou and Nei, 1987). The reliability of the phylogeny was tested by bootstrap analysis with 1000 replicates. The bootstrap values are indicated in the neighbor-joining consensus tree. The phylogenetic tree was constructed by ClustalW (<http://clustalw.ddbj.nig.ac.jp/>).

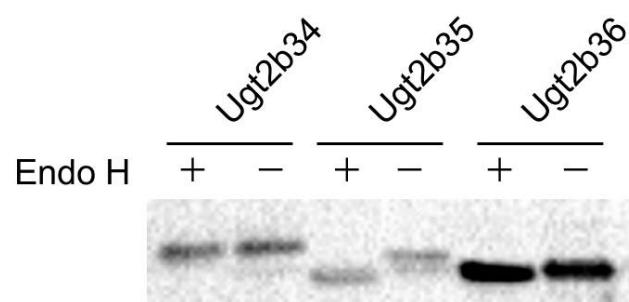

**Supplemental Figure S2 Deglycosylation of Ugt2b24, Ugt2b35 and Ugt2b36 with endoglycosidase H** Deglycosylation of Ugt was carried out according to Nakamura et al (2016) with slight modifications. Ugt2b34, 2b35 or Ugt2b36-expressed baculosomes (20 µg protein) were treated with or without Endo H (250U) at 37°C for 1h. Resulting sample (10 µg protein) was subjected to the SDS-PAGE. Western blotting was performed with anti-mouse low pI UGT antibody (Mackenzie et al, 1984) as the primary antibody.
